# Supplementary material for: Porous aromatic framework-based sequential therapeutic strategy for the treatment of periodontitis
Source: Royal Society of Chemistry journal article supplement (doi:10.1039/d5tb02342d), 2025-12-12
Supplement: d5tb02342d1.pdf [file d5tb02342d1.pdf]

## Supporting Information

### **Porous aromatic frameworks-based sequential therapeutic strategy for the treatment of periodontitis**

Fuming Yang <sup>a,b</sup>, Enpeng Xi <sup>b</sup>, Yun Zhao <sup>b</sup>, Gang Wang <sup>\*a</sup>, Nan Gao <sup>\*\*b</sup>, and Guangshan Zhu <sup>b</sup>

<sup>a</sup> *China-Japan Union Hospital of Jilin University, Changchun 130033, China*

<sup>b</sup> *Key Laboratory of Polyoxometalate and Reticular Material Chemistry of Ministry of Education and Faculty of Chemistry, Northeast Normal University, Changchun 130024, China*

---

<sup>a</sup> Corresponding author at China-Japan Union Hospital of Jilin University, Changchun 130033, China.

<sup>b</sup> Corresponding author at: Key Laboratory of Polyoxometalate and Reticular Material Chemistry of Ministry of Education and Faculty of Chemistry, Northeast Normal University, Changchun 130024, China.

E-mail addresses: Gang Wang, w\_g@jlu.edu.cn; Nan Gao, gaon320@nenu.edu.cn.

## Supporting Information

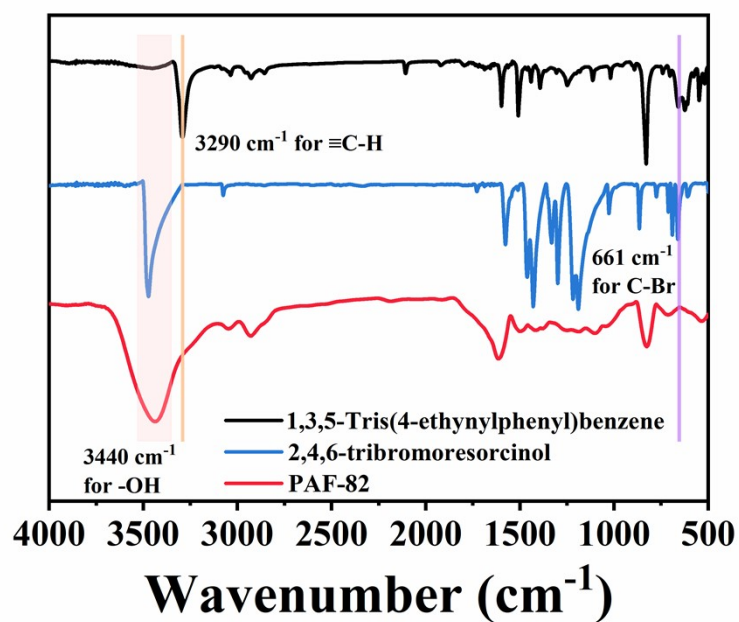

**Figure S1** FTIR images of 1,3,5-Tris(4-ethynylphenyl)benzene, 2,4,6-tribromoresorcinol and PAF.

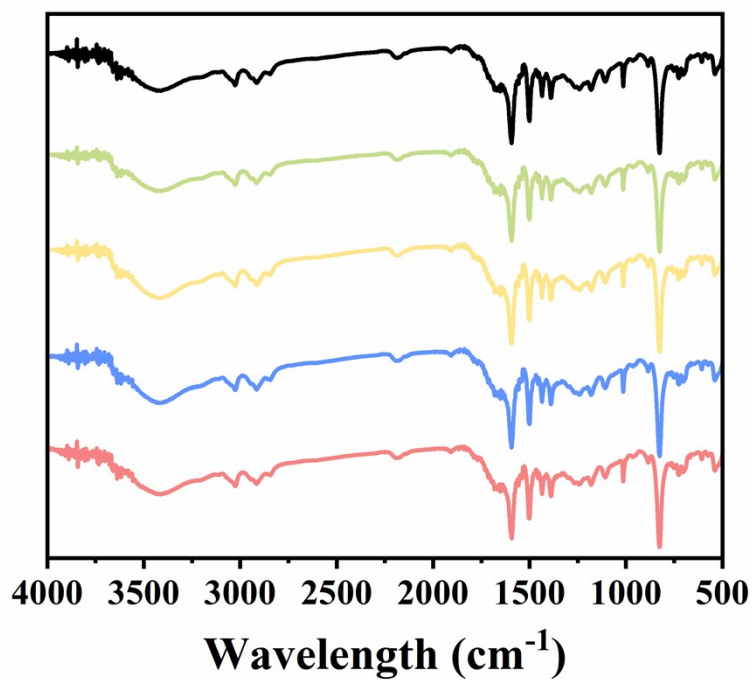

**Figure S2** FTIR images of PAF after being soaked for 7 days in different environments (Black: nothing; Green: ethanol; Yellow: 1 M NaOH; Blue: 1 M HCl; Red: 1 $\times$  PBS).

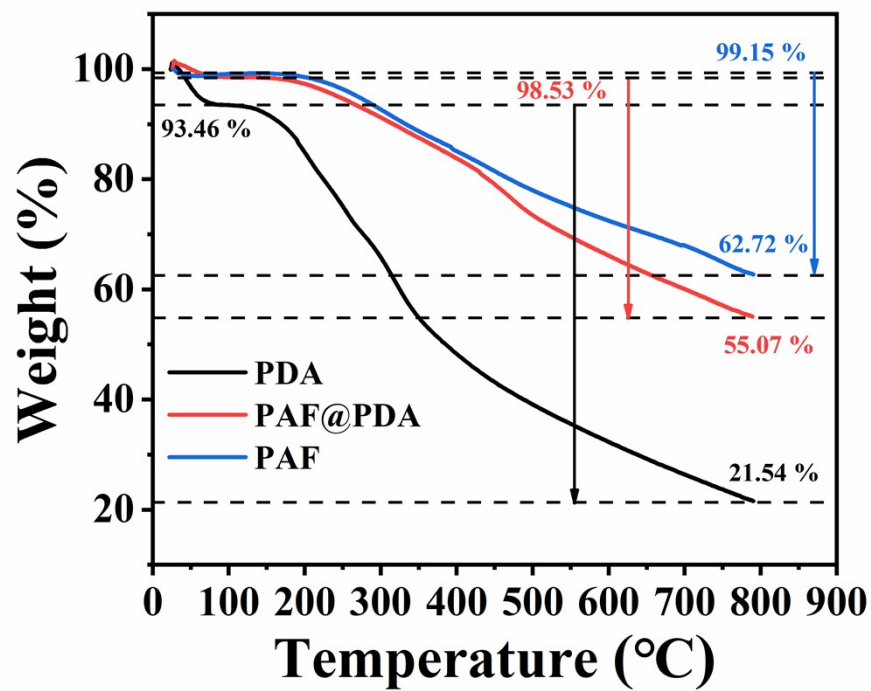

Figure S3 TGA images of PDA, PAF and PAF@PDA.

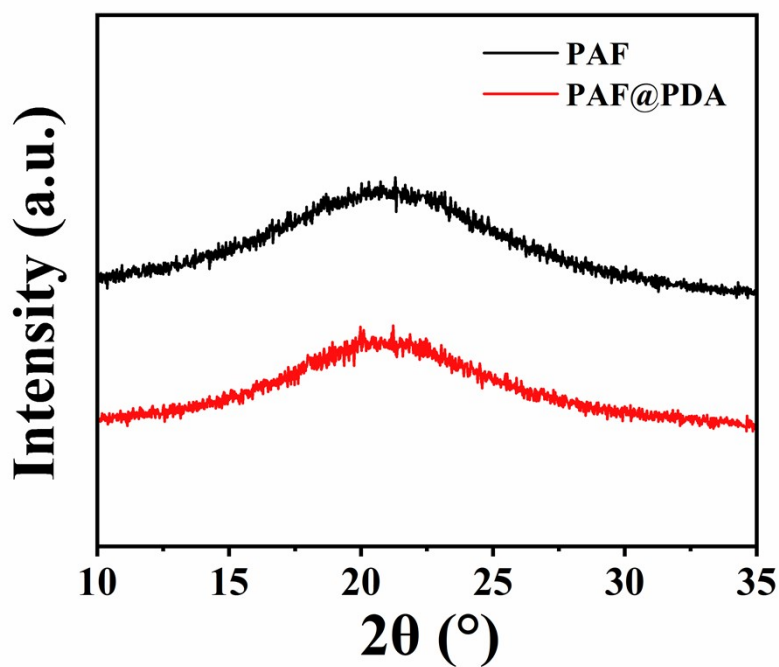

Figure S4 XRD images of PAF and PAF@PDA.

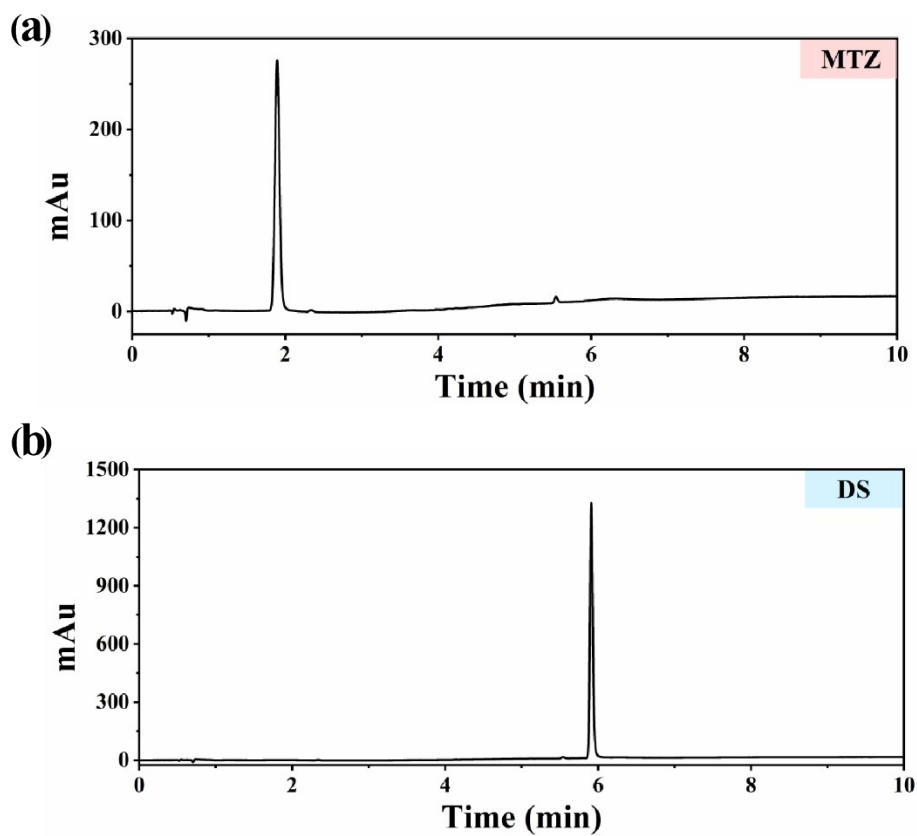

**Figure S5** HPLC determination of MTZ and DS. (a) HPLC image of MTZ at a concentration of 1 mg/mL. (b) HPLC image of DS at a concentration of 1 mg/mL.

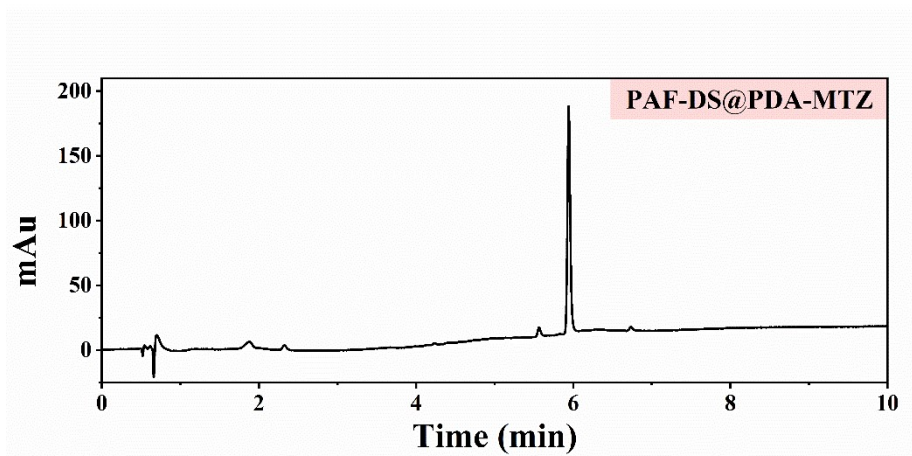

**Figure S6** HPLC image of PAF-DS@PDA-MTZ in the supernatant.

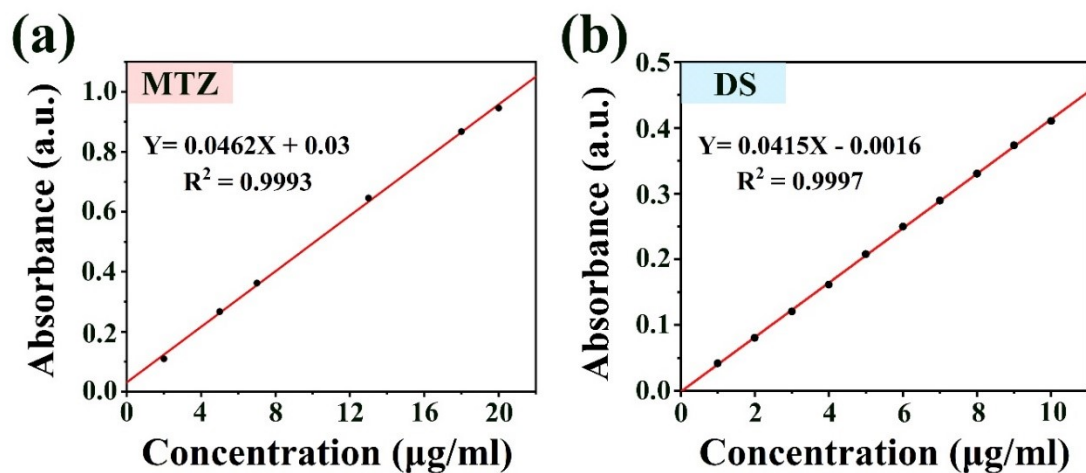

**Figure S7** Standard curves for UV-vis determination of MTZ and DS. (a) Standard curve for MTZ. (b) Standard curve for DS.

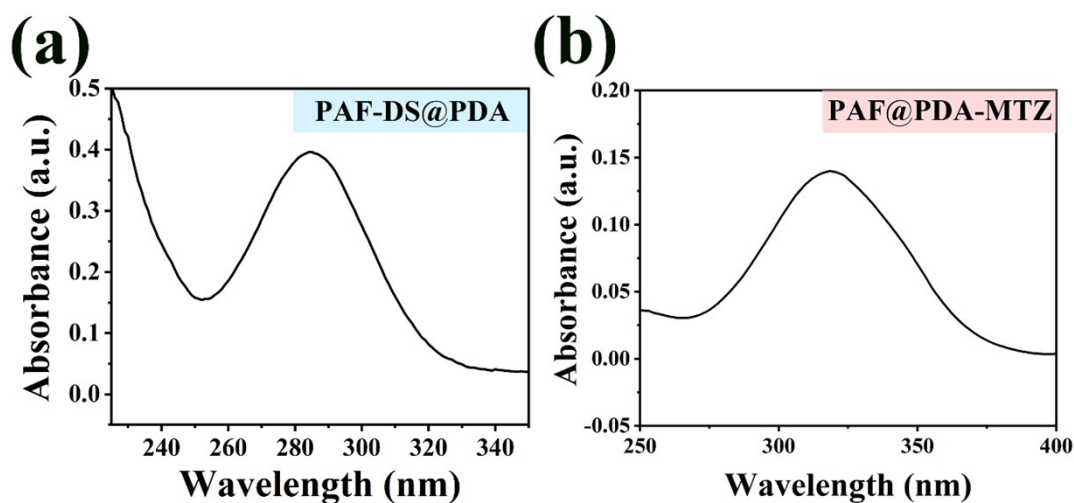

**Figure S8** UV-vis determination of DS and MTZ in PAF-DS@PDA and PAF@PDA-MTZ supernatants. (a) UV-vis image of DS in PAF-DS@PDA supernatant (Diluted 10 times). (b) UV-vis image of MTZ in PAF@PDA-MTZ supernatant (Diluted 10 times).

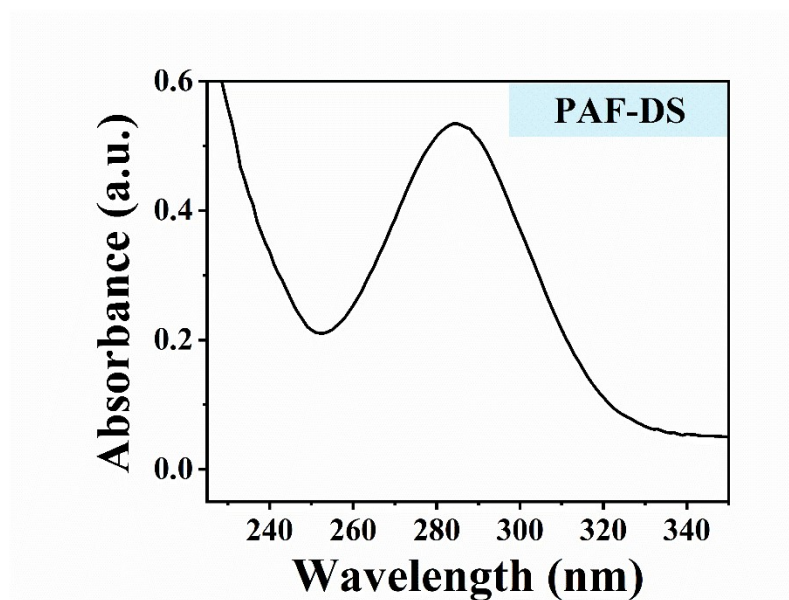

**Figure S9** UV-vis image of DS in PAF-DS supernatant (Diluted 10 times).

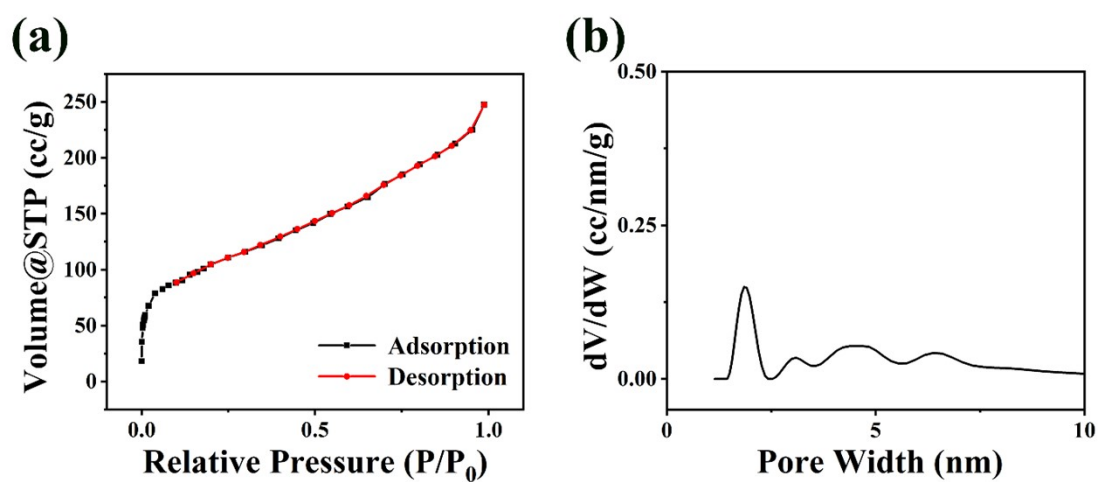

**Figure S10** (a)  $N_2$  adsorption-desorption isotherm of PAF-DS. (b) Pore size distribution of PAF-DS.

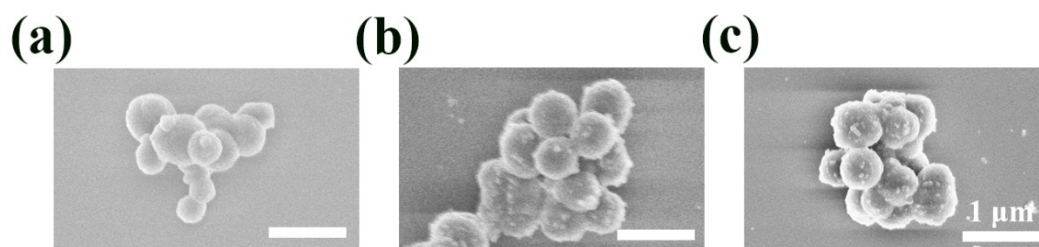

**Figure S11** SEM images of (a) PAF-DS, (b) PAF-DS@PDA and (c) PAF@PDA-MTZ.

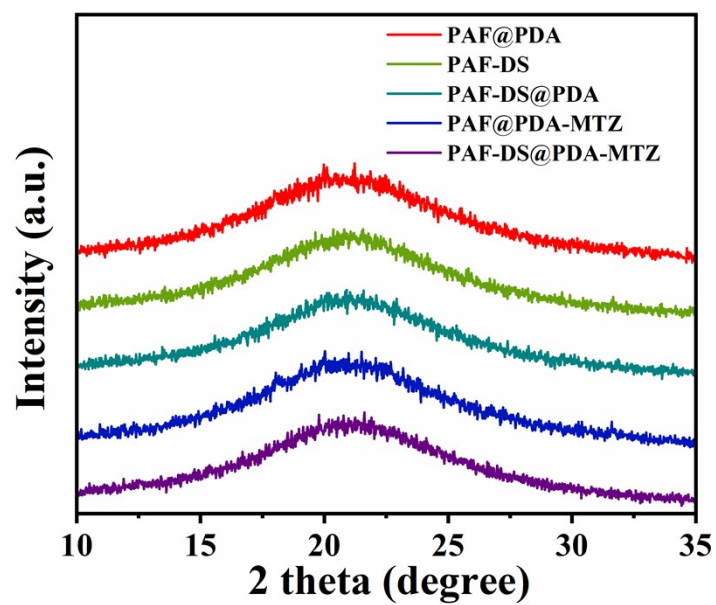

**Figure S12** XRD images of PAF@PDA, PAF-DS, PAF-DS@PDA, PAF@PDA-MTZ and PAF-DS@PDA-MTZ.

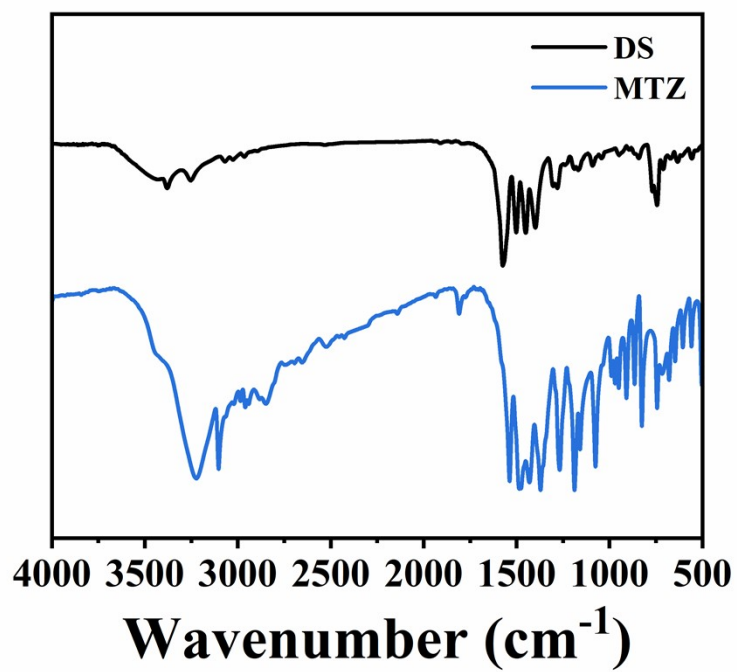

**Figure S13** FTIR images of DS and MTZ.

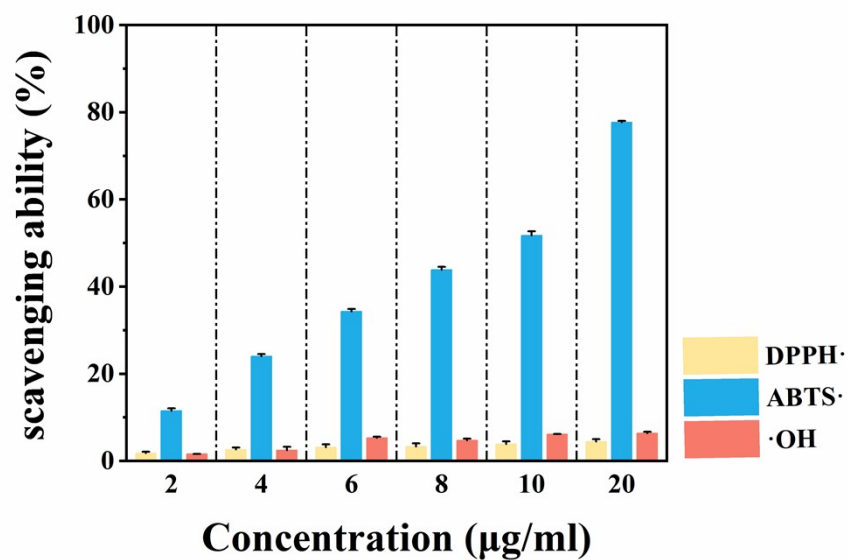

**Figure S14** Determination of antioxidant capacity of different concentrations of DS by DPPH method, ABTS method and Fenton reaction method.

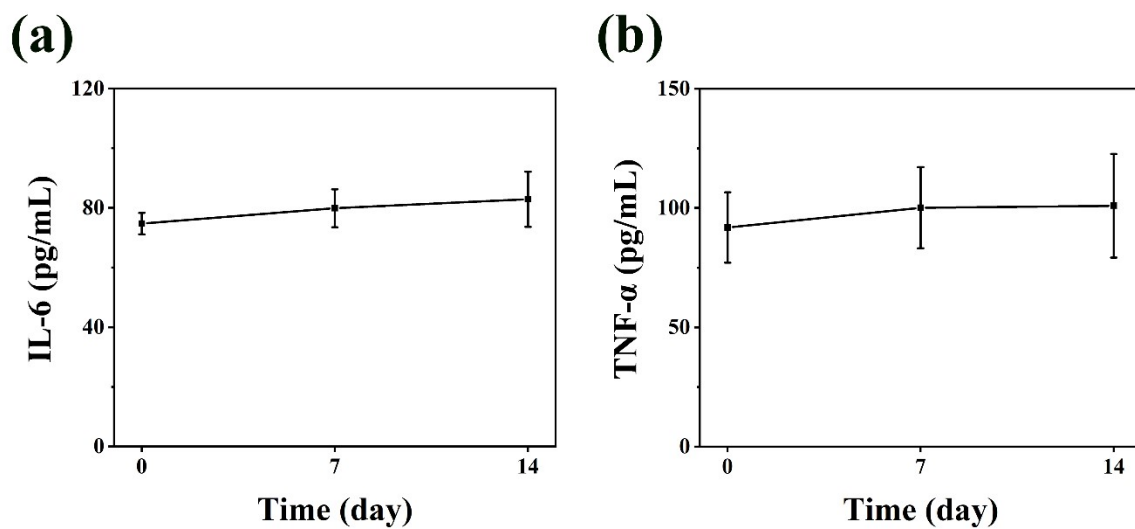

**Figure S15** Images of (a) IL-6 level and (b) TNF-α level in the biosafety experiment.



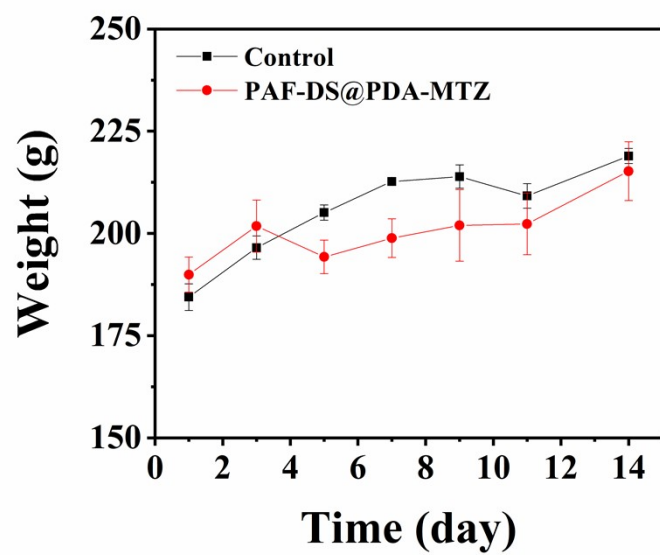

**Figure S16** Image of body weight changes in the biosafety experiment.

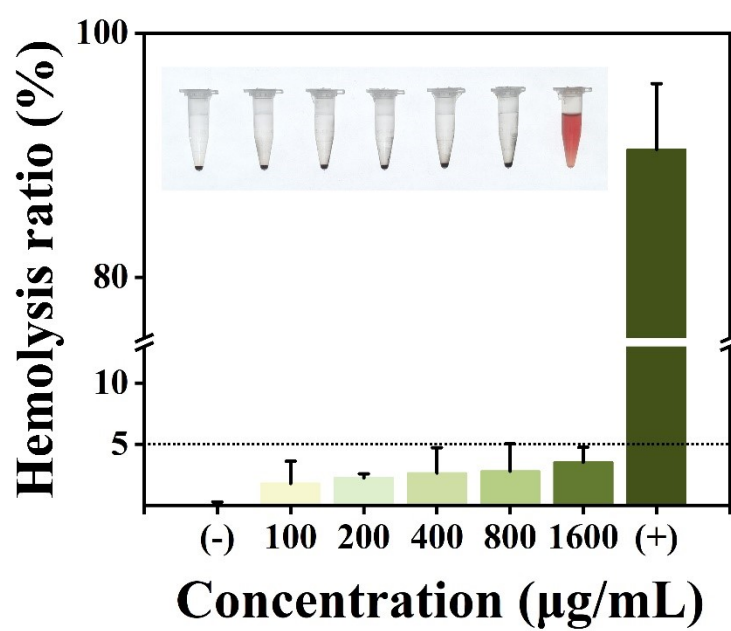

**Figure S17** Hemolysis ratio of RBCs treated with different concentrations of PAF-DS@PDA-MTZ.

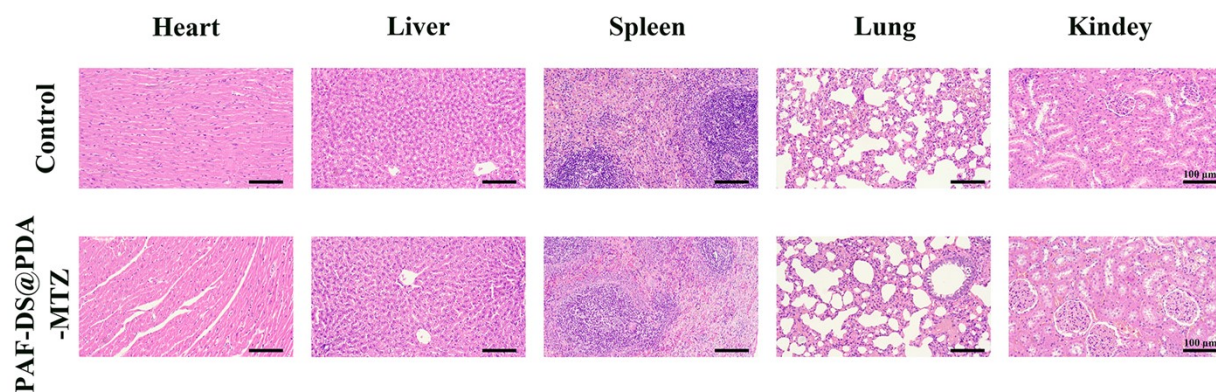

**Figure S18** H&E staining of major organs for biosafety experiments (scale bars are 100 μm).

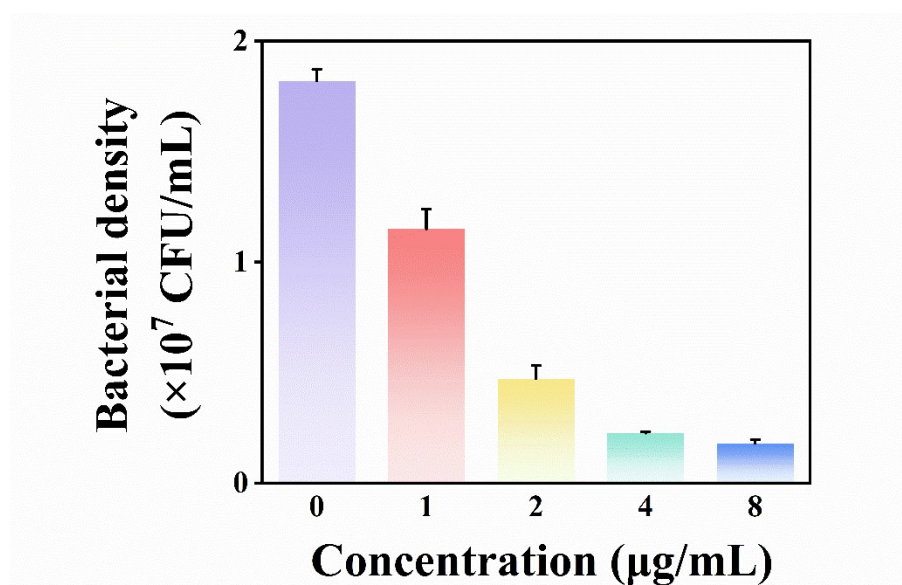

**Figure S19** Determination of the bactericidal effect of different concentrations of MTZ on *Porphyromonas gingivalis* at 5 hours.

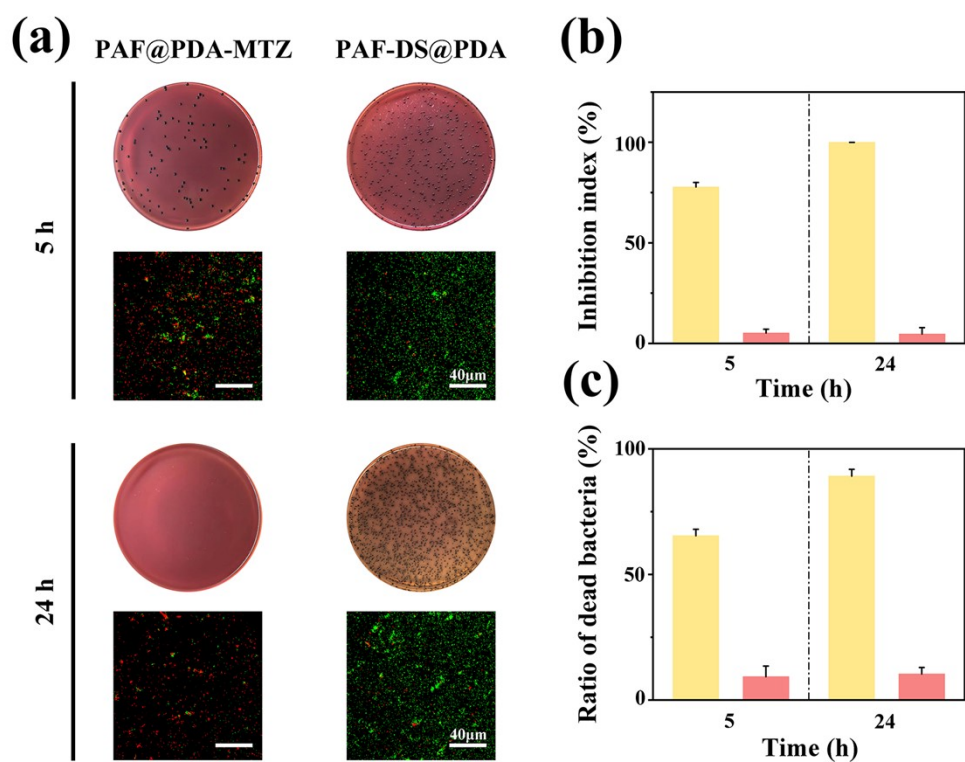

**Figure S20** Characterization of the *P. g*-killing ability. (a) Colony-forming assay and Live/dead staining of *P. g* after treatment with PAF@PDA-MTZ, PAF-DS@PDA (at equivalent drug concentrations), respectively. (b) Quantification of colony-forming assay of *P. g* after treatment. (c) Quantification of Live/dead staining of *P. g* after treatment.

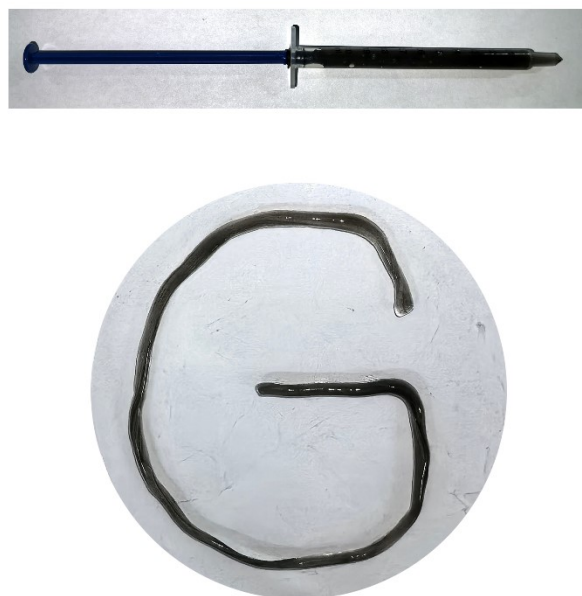

**Figure S21** Injectability of PAF-DS@PDA-MTZ-Gel through the syringe.

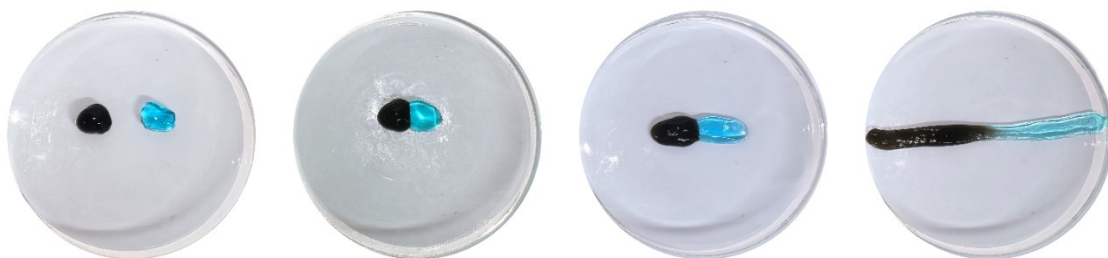

**Figure S22** Macroscopic self-healing property of PAF-DS@PDA-MTZ-Gel.

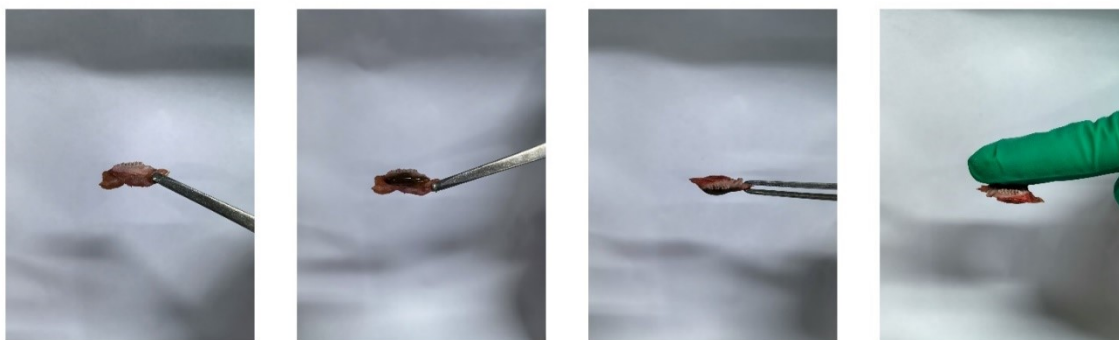

**Figure S23** Adhesion to rat gingiva.

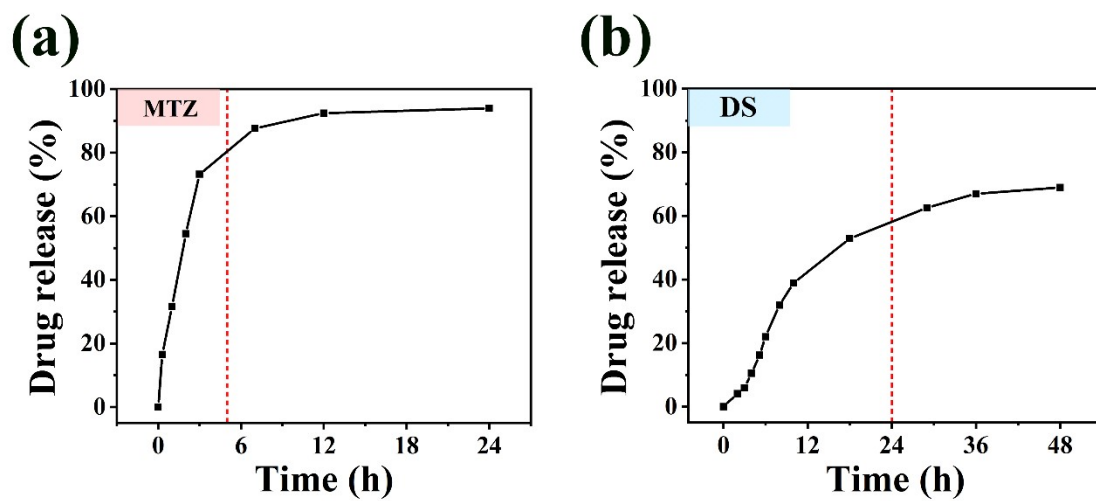

**Figure S24** Release process of MTZ and DS from the PAF@PDA-Gel loaded with MTZ or DS.

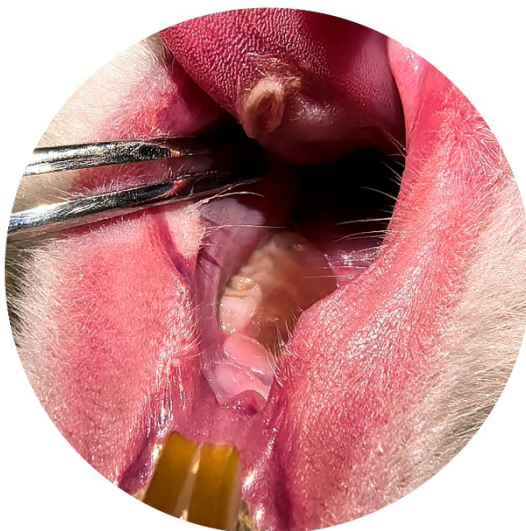

**Figure S25** Image of 200  $\mu$ L PAF-DS@PDA-MTZ-Gel adhered to periodontal tissue for treatment.

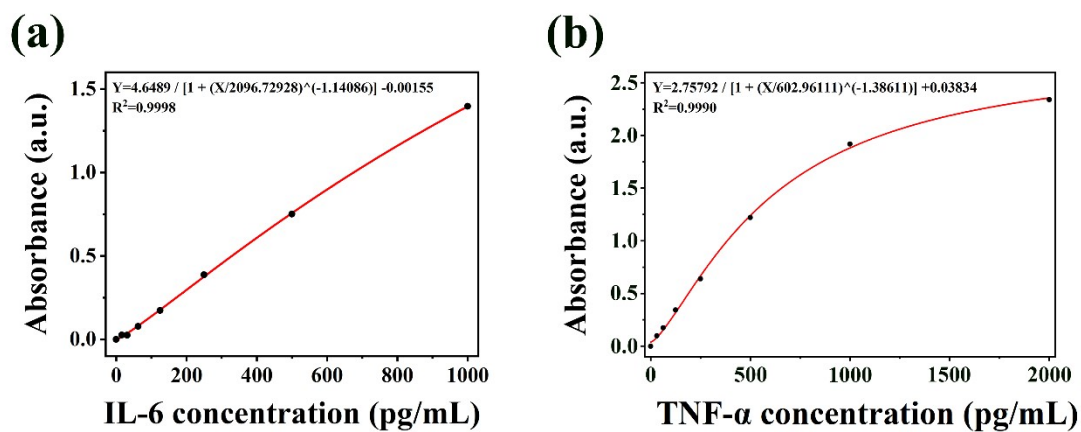

**Figure S26** Standardized curves for (a) IL-6 and (b) TNF- $\alpha$ .



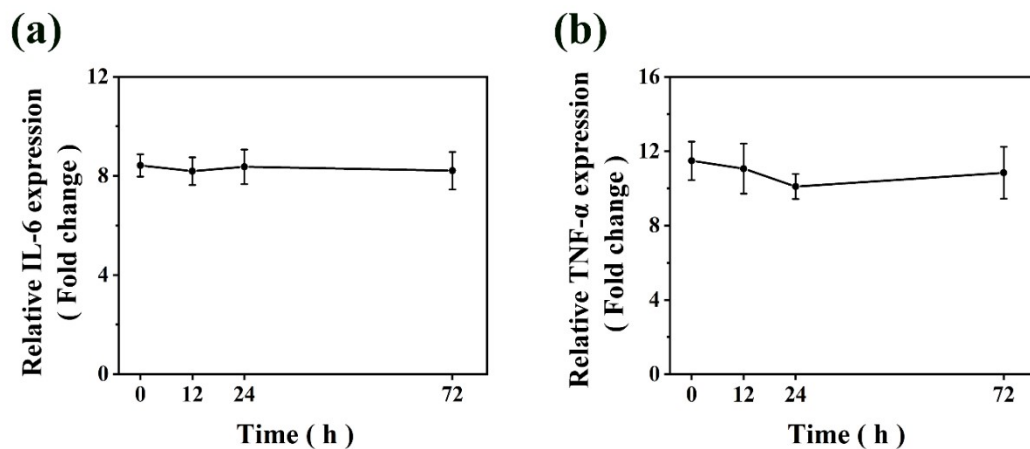

**Figure S27** Images of (a) IL-6 level and (b) TNF- $\alpha$  level in Blank-Gel group of the biosafety experiment.

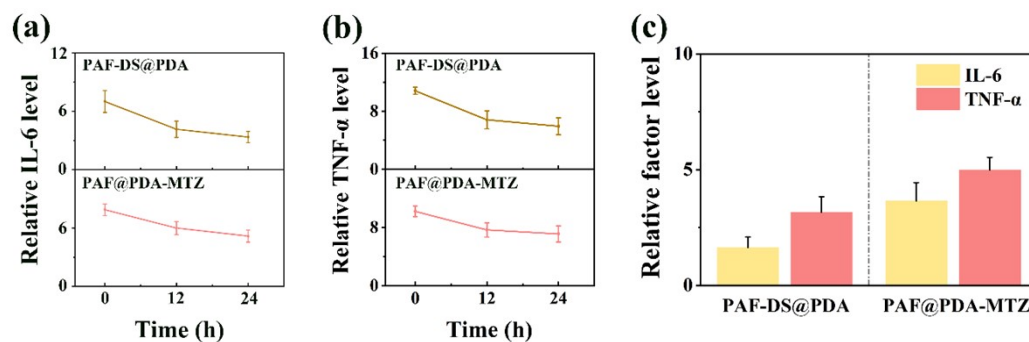

**Figure S28** Images of (a) IL-6 levels and (b) TNF- $\alpha$  levels in each group of the biosafety experiment. (c) Comparative images of inflammatory factor levels in the groups at 72 h.

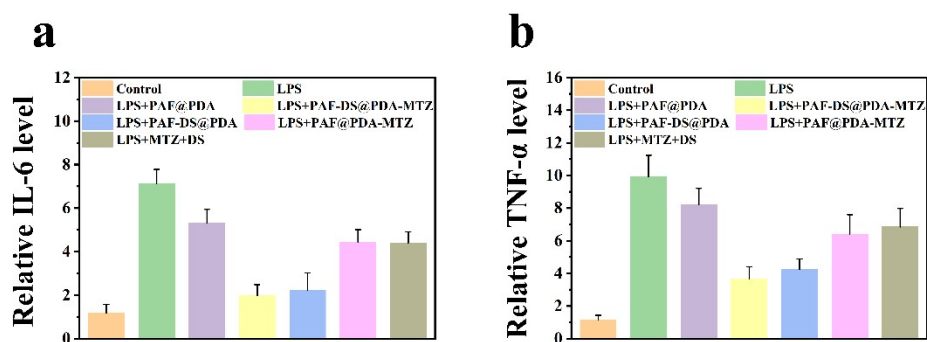

**Figure S29.** Comparative images of (a) IL-6 levels and (b) TNF- $\alpha$  levels in the groups at 48 h.

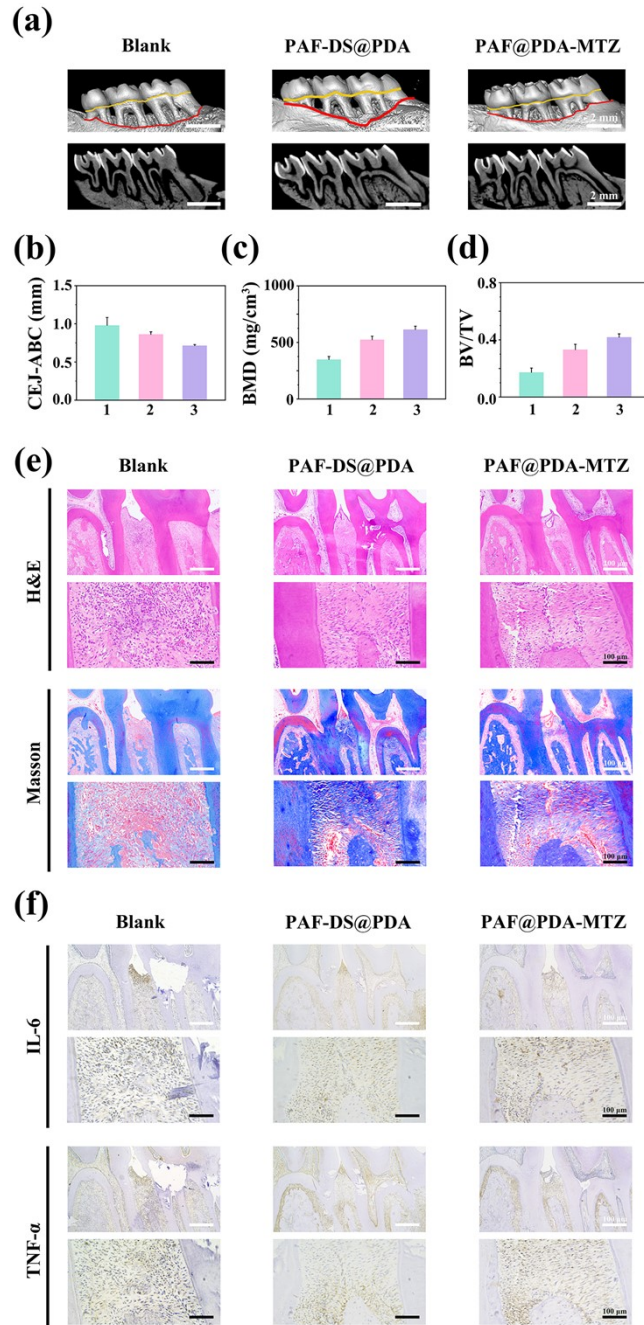

**Figure S30** (a) 3D reconstructed and the buccopalatal section images of the maxillary molars with different treatments by Micro-CT. Red and yellow lines represent the distance between ABC and CEJ (scale bar = 2 mm). (b) Quantitative evaluation of the distance between ABC and CEJ. (c-d) The quantitative statistics of different parameters of the alveolar bone (1: Blank; 2: PAF-DS@PDA; 3: PAF@PDA-MTZ). (e) H&E staining and Masson staining images of the periodontal tissue. (f) Immunohistochemical staining of periodontal tissue for IL-6 and TNF- $\alpha$  (white scale bar = 500  $\mu$ m, black scale bar = 100  $\mu$ m). Data are means  $\pm$  s.d. (n = 5). \* $p$  < 0.05, \*\* $p$  < 0.01, \*\*\* $p$  < 0.001.

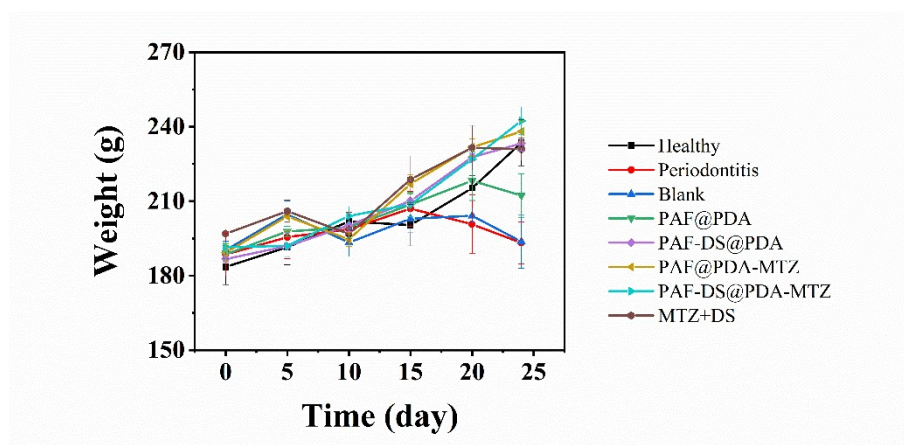

**Figure S31** Changes in body weight of rats.

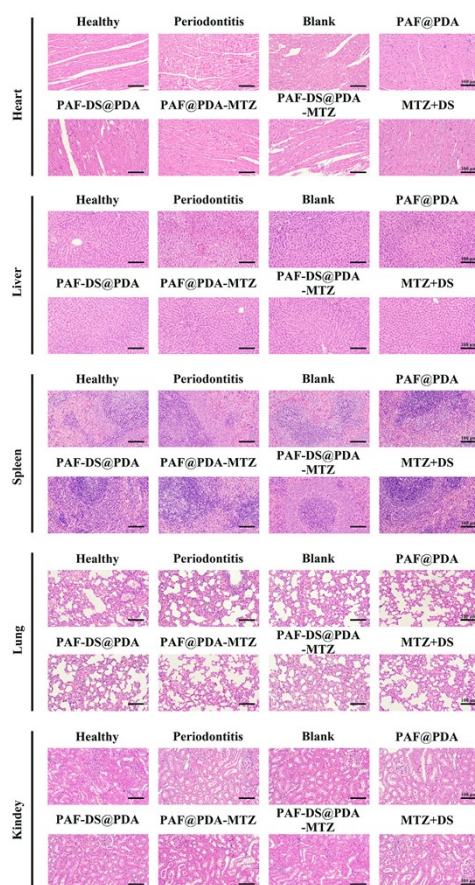

**Figure S32** H&E staining of major organs (scale bar: 100  $\mu$ m).
